# Supplementary material for: Psychometric Properties of the Abbreviated Version of the Dual School Climate and School Identification Measure–Student (SCASIM-St15) among Adolescents in China
Source: MDPI journal article supplement (doi:10.3390/ijerph192416535), 2022-12-09
Supplement: s1 [file s1]

### *Supplementary material*

Table S1. The Chinese version of the Abbreviated Version of the Dual School Climate and School Identification Measure-Student (SCASIM-St15)

| Subscale                               | English items                                                | Chinese items     |
|----------------------------------------|--------------------------------------------------------------|-------------------|
| Subscale 1: Student-student relations  | Item 1. Students treat each other with respect               | 同学之间是互相尊重的        |
|                                        | Item 2. Students are fair to each other                      | 同学之间是公平地对待对方的     |
|                                        | Item 3. Students show understanding to each other            | 同学之间是互相理解的        |
| Subscale 2: Staff-student relations    | Item 4. Staff go out of their way to help students           | 老师是尽力帮助学生的        |
|                                        | Item 5. Staff are fair in their dealing with students        | 老师是公平地对待学生的       |
|                                        | Item 6. Staff show understanding to students                 | 老师会表达对学生的理解       |
| Subscale 3: Academic emphasis          | Item 7. Teachers challenge students to do better             | 老师会给学生挑战，使他们做得更好  |
|                                        | Item 8. Teachers want every student to do their best         | 老师想每一个学生都做到最好     |
|                                        | Item 9. Teachers believe that every student can be a success | 老师相信每一个学生都会成功     |
| Subscale 4: Shared values and approach | Item 10. There is a sense that we are all on the same team   | 学校有大家都属于同一个团队的感觉  |
|                                        | Item 11. There is school spirit and pride                    | 学校是具有学校精神和自豪感的    |
|                                        | Item 12. The school values and goals are well understood     | 学校有大家都清楚理解的价值观和目标 |
| Subscale 5: School identification      | Item 13. I am happy to be a part of this school              | 我很开心自己是学校的一份子     |
|                                        | Item 14. I feel a strong connection with this school         | 我觉得自己与学校紧密相连      |
|                                        | Item 15. I identify with this school                         | 我认同自己是学校的一份子      |

Table S2 Correlation matrix among the factors of SCASIM-St15

|                                 | 1       | 2       | 3       | 4       | 5 |
|---------------------------------|---------|---------|---------|---------|---|
| <b>School climate</b>           |         |         |         |         |   |
| 1. Student-student relations    | -       |         |         |         |   |
| 2. Staff-student relations      | 0.56*** | -       |         |         |   |
| 3. Academic emphasis            | 0.55*** | 0.85*** | -       |         |   |
| 4. Shared values and approach   | 0.61*** | 0.76*** | 0.80*** | -       |   |
| <b>5. School identification</b> | 0.57*** | 0.69*** | 0.72*** | 0.85*** | - |

Note. \*\*\*,  $p < 0.001$ .
